# Supplementary material for: CircLphn3 protects the blood-brain barrier in traumatic brain injury
Source: PubMed Central journal article supplement — Neural Regen Res. 2021 Aug 30;17(4):812–8. doi: 10.4103/1673-5374.322467 (PMC8530114; doi:10.4103/1673-5374.322467), 2021-08-30
Supplement: NRR-17-812_Suppl1.pdf [file NRR-17-812_Suppl1.pdf]

**Additional file 1 Design and sequence of circLphn3 overexpression plasmid**

mmu\_circ\_0001358 overexpression plasmids were designed according to the previous report (Liu et al., 2018). The specific sequences were shown as follows:

The sequence of **upstream fragment**-**mmu\_circ\_0001358**-**and endogenous flanking sequence**-**downstream fragment** (exon is underlined):

```
1 TGGACT TAGATT TTGTTT CTAAC AGAAAG ATTATA TATAGG TTATAT ATTCTG ATATGT
61 TTATAT GAGTGG AAAAAT TGATCA TATTTA AAATGA AATAGG CAGCAA TTACGT CTTTTT
121 TCATGA TCAAAA TACAGT AATTGC TAAAGA CTTTCT AGTCCA TTTGAT GGTTAG GTGAAA
181 TCTTTG TTCTAT TAACTT CCTTTT ATTTT CCTAGT GGGTGA GAGATA CAGTTC TTAAC
241 GATGAA ATTTA TACAGC ATAAAA ATAATT GCTTTT TATCTC AAATTG AGAATT ACTTTA
301 TTTCTT TTGGGG GGGTTT TATGAT TCCTTA TATTGC AAAGCC ATTTGA AATTTA ATGTAA
361 TCTGAC CTTACT ATGTGA AGCTGG GCTATT TTTCTG CCTCCT TCTCAA TCTTGT TCTATA
421 GCTGGG TGTTC CCAAT ACAAT TGTGCT TTGCTC CCTGTT GTTTA GTTTAT TCTGGT
481 CCTTGG TCTCTT AAGTAC CTTTCC ATTCTT TTCATT CTAGTA ACTACC TGTTA TCCTCC
541 AGGACC TAATC AGATGT TACTTC TTTATG AATTTT TGAATT ATTCTT CGCCCC ATGCTC
601 CCAACA GAATTA ATAGTT CCCGTC TTTTGG TTGTCA ACATCT ATCAAT CATAGA TACGTC
661 ATAGTT ATTAAG GGTGGG GTCCAT GTGTTA TTCATC CTTGTA TCTTCT AGGACA AGCAGT
721 AGTTAA CATTG TTGAAT TGAAAT GTTTA AAATC CATGCT TCAGAT GATTAA GAAATA
781 CTAGGA GGAAA CAGACA GATAGA TGTTA TGTTTT ATTTT TAAAG CACTT CAGATC
841 CCCCCT TAATA GTCTGA AGTCCT AAGGCA GCAAAC TTTCTT TAGTTT TATGTA ACTGGA
901 AGGCAA AATAAC ATCAGT GTTGCT ATTCAT GATGAC TTAAGC TTACAT GAATTT ACTATT
961 TCTTC TTTGA TTTCAG ATGCAA TAACAG AACCCA GTGTGC AGTGGT GGCAGG TCCTGA
1021 TGTATT TCCAGA CCCATG TCCGGG AACATA TAAATA CCTTGA AGTGCA GTATGA ATGTGT
1081 CCCTTA TAAAGT GGAACA AAAAGT TTTTCT TTGTCC TGGACT GCTAAA AGGAGT GTACCA
1141 GAGTGA AACTT GTTGA ATCTGA CCACCA ATCTGG GGCATG GTGCAA GGACCC TCTACA
1201 GGCTTC TGACAA GATTTA CTATAT GCCCTG GACTCC CTACAG AACTGA CACCCT GACAGA
1261 GTATTC GTCCAA AGATGA CTTTAT TGCTGG AAGGCC AACAAC TACCTA CAAGCT CCCTCA
1321 CAGAGT GGATGG CACTGG ATTTGT AGTATA CGATGG TGCCCT CTCTT CAACAA GGAGCG
1381 GACAAG GAACAT TGTAAT GTTTGA TTTGAG GACTAG GATAAA GAGTGG AGAGGC AATCAT
1441 AGCAA TGCTAA TTACCA TGACAC CTCCCC ATACCG ATGGGG TGGCAA GTCCGA CATAGA
1501 CTTGGC AGTGA TGAATA TGGATT ATGGGT AATCTA TGCAAC AGAACA GAACAA TGGCAA
1561 GATTGT CATTAG CCAGTT GAACCC TTACAC CCTACG GATTGA GGGGAC ATGGGA CACTGC
1621 CTATGA TAAAAG GTCAGC TTCAA TGCATT CATGAT TTGTGG GATTCT GTATGT GTTCAA
1681 ATCTGT ATATGA GGATGA TGACAA CGAGGC CACCGG TAATA GATTGA CTACAT TTACAA
1741 CACTGA CCAAAG CAAGGA TAGCTT GGTGGA TGTACC CTTTCC CAATC TTACCA GTACAT
1801 AGCAGC TGTGGA TTACAA TCCCAG GGACAA TCTGCT CTATGT GTGGAA TAACTA CCACGT
1861 TGTGAA ATACTC TTTGGA CTTCGG GCCTCT GGATAG TAGATC AGGGCC GGTACA TCATGG
1921 ACAAGT CTCTA CATCTC TCCACC AATTCA CCTCGA CTCTGA ACTAGA AAGGCC CCCTGT
1981 CAGAGG TGAGTT TTCTTG ACTTGA GGCAA AGAAGC AGTGTT CAGTGC TGACTA AGGGGA
2041 ATGAAT GAACT AGGTGA GGTTGT AATATG CATTTC CAGTGC AGTACC TTTTCA AAAATG
2101 AAAATT AGCATG TGAATA AAATCT TACTTA TAAACA GAAGCA TGAAT ACTGTT CCAAGA
2161 AATAGA TGACTC CATTTA TTCAA ATTTCT TAATCA TCTGAA GCATGG AGTTT AAAACA
2221 TTTCAA TTCAAC AAATGT TAACTA CTGCTT GTCCTA GAAGAT ACAAGG ATGAAT AACACA
2281 TGGACC CCACCC TTAATA ACTATG ACGTAT CTATGA TTGATA GATGTT GACAAC CAAAAG
2341 ACGGGA ACTATT AATTCT GTTGGG AGCATG GGGCGA AGAATA ATTCAA AATTTC ATAAAG
2401 AAGTAA CATCTG AATTAG GTCCTG GAGGAT AACAG GTAGTT ACTAGA ATGAAA AGAATG
2461 GAAAGG TACTTA AGAGAC CAAGGA CCAGAA TAACT AAAACA ACAGGG AGCAA
GCACAG
2521 ATTGTA TTTGGG GAACAC CCAGCT ATAGAA CAAGAT TGAGAA GGAGGC AGAAAA ATAGCC
```

2581 CAGCTT CACATA GTAAGG TCAGAT TACATT AAATTT CAAATG GCTTTG CAATAT AAGGAA  
2641 TCATAA AACCCC CCCAAA AGAAAT AAAGTA ATTCTC AATTTG AGATAA AAAGCA ATTATT  
2701 TTTATG CTGTAT AAAATT TCATCA GTTAAG AACTGT ATCTCT CACCCA CTAGGA AAAATA  
2761 AAAGGA AGTTAA TAGAAC AAAGAT TTCACC TAACCA TCAAAT GGACTA GAAAGT CTTTAG  
2821 CAATTA CTGTAT TTTGAT CATGAG AAAAGA CGTAAT TGCTGC CTATTT CTTTTT AAATAT  
2881 GATCAA TTTTTC CACTCA TATAAA CATATC AGAATA TATAAC CTATAT ATAATC TTTCTG  
2941 TTTAGG AACAAA ATCTAA GTCCA

#### References

Liu D, Conn V, Goodall GJ, Conn SJ (2018) A highly efficient strategy for overexpressing circRNAs. *Methods Mol Biol* 1724:97-105.
